# Supplementary material
Source: PubMed Central journal article supplement (PMC5461789)
Supplement: ASN.2016060670SupplementaryData.pdf [file ASN.2016060670SupplementaryData.pdf]

**Supplemental Table 1. Characteristics of the renal transplant recipients with IgA nephropathy as native disease**

| Characteristic                                                                            | ALL<br>RECIPIENTS<br>Initial Cohort                                       | FIRST-GRAFT<br>RECIPIENTS<br>Selected CNI<br>Cohort                       | Comparisons<br>P               |
|-------------------------------------------------------------------------------------------|---------------------------------------------------------------------------|---------------------------------------------------------------------------|--------------------------------|
| Number                                                                                    | <b>122</b>                                                                | <b>96</b>                                                                 |                                |
| Gender, Male (%)                                                                          | 102 (83.6)                                                                | 79 (82.3)                                                                 | NS                             |
| Recipient Age, mean (SD) yr                                                               | 46.9 (13.94)                                                              | 48.1 (14.2)                                                               | NS                             |
| First transplant                                                                          | 103                                                                       | 96                                                                        |                                |
| Two or more transplantations                                                              | 19                                                                        | 0                                                                         |                                |
| Donor Type<br>Deceased (%)<br>Living                                                      | 117 (95.9)<br>5                                                           | 92 (95.8)<br>4                                                            | NS                             |
| Donor Age, mean (SD) yr                                                                   | 41.0 (15.0)                                                               | 42.0 (15.0)                                                               | NS                             |
| Initial Immunosuppression n (%)<br>Conventional (%)<br>Cyclosporine (%)<br>Tacrolimus (%) | 8 (6.6)<br>61 (50.0)<br>53 (43.4)                                         | 0<br>52 (54.2)<br>44 (45.8)                                               | <b>0.04</b><br>$\chi^2 = 6.54$ |
| Induction Therapy<br>ALG<br>Basiliximab<br>None                                           | 27 (22.1)<br>48 (39.3)<br>47 (38.5)                                       | 17 (17.7)<br>39 (40.6)<br>40 (41.7)                                       | NS                             |
| Graft Failure Causes n (%)<br>Death<br>Rejection<br>IgAN Recurrence<br>Others             | <b>69 (56.6)</b><br>20 (29.0)<br>22 (31.9)<br><b>21 (30.4)</b><br>6 (8.7) | <b>47 (49.0)</b><br>13 (27.7)<br>13 (27.7)<br><b>17 (36.2)</b><br>4 (8.5) | NS                             |
| Death Causes n (%)<br>Cardiovascular<br>Cancer<br>Infection<br>Others                     | <b>20 (16.4)</b><br>8 (40.0)<br>7 (35.0)<br>3 (15.0)<br>2 (10.0)          | <b>13 (13.5)</b><br>6 (46.2)<br>4 (30.8)<br>1 (7.7)<br>2 (15.4)           | NS                             |
| Follow-up after transplantation<br>mean (SD) + (range) yr                                 | <b>11.9 (6.2)</b><br>+ (0.02- 28.11)                                      | <b>12.4 (6.1)</b><br>+ (0.02-28.11)                                       | NS                             |

Initial cohort of 122 IgAN patients included those who had undergone kidney transplantation in Saint-Etienne and for whom archived frozen serum samples

obtained at time of engraftment were available. For this study, we excluded 19 patients who had been previously transplanted (including one conventional treatment) and seven others (all conventional immunosuppression) who were transplanted before December 1984 when cyclosporine became commercially.

CNI, calcineurin inhibitor; ALG, polyclonal anti-lymphocyte globulin; Basiliximab, monoclonal antibody targeting CD25
